# Supplementary material for: Tracking down the White Plague: The skeletal evidence of tuberculous meningitis in the Robert J. Terry Anatomical Skeletal Collection
Source: PubMed Central journal article supplement (PMC7080279; doi:10.1371/journal.pone.0230418), 2020-03-18
Supplement: pone.0230418.s001.pdf [file pone.0230418.s001.pdf]

**S1 Table: Basic biographic data of individuals in the TB group (N=234).**

(MR = morgue record; DC1 = death certificate primary; DC2 = death certificate secondary; DC3 = death certificate tertiary; c. = circa; F = female; M = male; + = exhibiting GIs; - = not exhibiting GIs)

| No. | Terry No. | Age at death | Sex | Cause of death      |              |                            |     | Exhibiting GIs or not |
|-----|-----------|--------------|-----|---------------------|--------------|----------------------------|-----|-----------------------|
|     |           |              |     | MR                  | DC1          | DC2                        | DC3 |                       |
| 1   | 13R       | 28 years     | M   | Pulmonary TB        | —            | Infection of the right toe | —   | —                     |
| 2   | 23R       | 49 years     | F   | Pulmonary TB        | —            | —                          | —   | —                     |
| 3   | 30R       | 26 years     | M   | TB                  | —            | TB meningitis              | —   | +                     |
| 4   | 35R       | 60 years     | M   | Pulmonary TB        | —            | —                          | —   | —                     |
| 5   | 39        | 22 years     | F   | TB, pneumonia       | Pneumonia    | —                          | —   | —                     |
| 6   | 54        | 36 years     | M   | TB, diarrhoea       | Pulmonary TB | —                          | —   | —                     |
| 7   | 84        | c. 24 years  | M   | Pulmonary TB        | Pulmonary TB | —                          | —   | +                     |
| 8   | 87R       | 73 years     | F   | Lues                | Lues         | Suspected TB               | —   | +                     |
| 9   | 89R       | c. 32 years  | M   | TB                  | —            | —                          | —   | —                     |
| 10  | 90        | 18 years     | M   | —                   | Ichthyosis   | Pulmonary TB               | —   | —                     |
| 11  | 91R       | c. 65 years  | F   | Pulmonary condition | Pulmonary TB | —                          | —   | —                     |
| 12  | 95        | c. 35 years  | F   | Pulmonary TB        | —            | —                          | —   | +                     |

| No. | Terry No. | Age at death | Sex | Cause of death     |              |     |           | Exhibiting GIs or not |
|-----|-----------|--------------|-----|--------------------|--------------|-----|-----------|-----------------------|
|     |           |              |     | MR                 | DC1          | DC2 | DC3       |                       |
| 13  | 95R       | c. 30 years  | M   | Pulmonary TB       | —            | —   | —         | —                     |
| 14  | 103R      | c. 74 years  | F   | —                  | Emphysema    | TB  | —         | —                     |
| 15  | 114       | 43 years     | F   | TB                 | —            | —   | —         | —                     |
| 16  | 128       | 21 years     | M   | TB                 | Pulmonary TB | —   | —         | —                     |
| 17  | 129       | 18 years     | M   | TB spondylitis     | —            | —   | —         | +                     |
| 18  | 130       | 58 years     | M   | Pellagra           | Pulmonary TB | —   | Inanition | —                     |
| 19  | 138       | 49 years     | M   | Pulmonary phthisis | Pulmonary TB | —   | —         | +                     |
| 20  | 139       | 33 years     | F   | TB                 | Pulmonary TB | —   | —         | +                     |
| 21  | 145R      | 31 years     | M   | Pulmonary TB       | —            | —   | —         | +                     |
| 22  | 146R      | 30 years     | F   | Pulmonary TB       | Pulmonary TB | —   | Nephritis | —                     |
| 23  | 158R      | c. 32 years  | F   | TB                 | Pulmonary TB | —   | —         | +                     |
| 24  | 182       | 43 years     | M   | Pulmonary TB       | Pulmonary TB | —   | —         | +                     |
| 25  | 194       | 73 years     | M   | Pulmonary TB       | —            | —   | —         | —                     |
| 26  | 204       | 24 years     | M   | Pulmonary TB       | —            | —   | —         | —                     |

| No. | Terry No. | Age at death | Sex | Cause of death                   |                |     |     | Exhibiting GIs or not |
|-----|-----------|--------------|-----|----------------------------------|----------------|-----|-----|-----------------------|
|     |           |              |     | MR                               | DC1            | DC2 | DC3 |                       |
| 27  | 205       | 42 years     | M   | Pulmonary TB                     | Pulmonary TB   | —   | —   | +                     |
| 28  | 207       | 45 years     | M   | Pulmonary TB                     | —              | —   | —   | —                     |
| 29  | 220       | c. 56 years  | M   | Pulmonary TB                     | —              | —   | —   | +                     |
| 30  | 222       | 20 years     | M   | Pulmonary TB                     | Pulmonary TB   | —   | —   | +                     |
| 31  | 230       | 37 years     | M   | Pulmonary TB                     | —              | —   | —   | +                     |
| 32  | 232R      | c. 35 years  | F   | Pulmonary TB                     | —              | —   | —   | +                     |
| 33  | 235       | 29 years     | M   | —                                | Miliary TB     | —   | —   | —                     |
| 34  | 248R      | 70 years     | F   | Possible TB                      | Pneumonia      | —   | —   | —                     |
| 35  | 250       | 52 years     | M   | Laparotomy,<br>stomach carcinoma | TB peritonitis | —   | —   | —                     |
| 36  | 251       | 34 years     | M   | TB                               | Pulmonary TB   | —   | —   | —                     |
| 37  | 254       | 21 years     | M   | Pulmonary TB                     | —              | —   | —   | —                     |
| 38  | 255       | 22 years     | F   | Pulmonary TB                     | —              | —   | —   | +                     |
| 39  | 264       | c. 67 years  | M   | TB,<br>pneumonia                 | —              | —   | —   | —                     |
| 40  | 265       | 32 years     | M   | TB                               | —              | —   | —   | —                     |

| No. | Terry No. | Age at death | Sex | Cause of death               |                     |                |                           | Exhibiting GIs or not |
|-----|-----------|--------------|-----|------------------------------|---------------------|----------------|---------------------------|-----------------------|
|     |           |              |     | MR                           | DC1                 | DC2            | DC3                       |                       |
| 41  | 267       | c. 42 years  | M   | Pulmonary TB                 | —                   | —              | —                         | —                     |
| 42  | 269       | 20 years     | M   | TB                           | —                   | —              | —                         | +                     |
| 43  | 270       | 55 years     | M   | TB                           | —                   | —              | —                         | +                     |
| 44  | 279       | 34 years     | M   | Pulmonary TB                 | —                   | —              | —                         | +                     |
| 45  | 280       | 24 years     | F   | TB                           | —                   | —              | —                         | +                     |
| 46  | 282       | 57 years     | M   | Myocarditis                  | Pulmonary TB        | Myocarditis    | —                         | —                     |
| 47  | 283R      | 40 years     | M   | TB,<br>haemorrhage           | Pulmonary TB        | —              | —                         | —                     |
| 48  | 284       | c. 67 years  | M   | TB                           | —                   | —              | —                         | —                     |
| 49  | 304       | 20 years     | F   | —                            | Pulmonary TB        | —              | —                         | —                     |
| 50  | 306       | 18 years     | F   | Pulmonary TB                 | —                   | —              | —                         | —                     |
| 51  | 309       | 45 years     | M   | Pulmonary TB                 | Pulmonary TB        | TB spondylitis | Mastoiditis,<br>sinusitis | —                     |
| 52  | 318       | 45 years     | M   | Pulmonary TB,<br>myocarditis | Pulmonary TB        | —              | —                         | —                     |
| 53  | 328R      | 65 years     | F   | Possible TB,<br>pleurisy     | Pulmonary carcinoma | Undetermined   | —                         | —                     |
| 54  | 329       | 18 years     | M   | Pulmonary TB,<br>syphilis    | Pulmonary TB        | Syphilis       | —                         | +                     |

| No. | Terry No. | Age at death | Sex | Cause of death              |                  |              |                          | Exhibiting GIs or not |
|-----|-----------|--------------|-----|-----------------------------|------------------|--------------|--------------------------|-----------------------|
|     |           |              |     | MR                          | DC1              | DC2          | DC3                      |                       |
| 55  | 341       | 38 years     | F   | Pulmonary TB                | —                | —            | —                        | +                     |
| 56  | 353       | c. 37 years  | M   | —                           | TB peritonitis   | —            | —                        | —                     |
| 57  | 358R      | c. 36 years  | M   | Pulmonary TB                | —                | —            | —                        | —                     |
| 58  | 382R      | 26 years     | M   | Pulmonary TB                | —                | —            | —                        | —                     |
| 59  | 385       | 21 years     | M   | —                           | Pulmonary TB     | —            | —                        | —                     |
| 60  | 386R      | 66 years     | M   | Pulmonary TB                | —                | —            | —                        | —                     |
| 61  | 400       | c. 44 years  | M   | TB                          | —                | —            | —                        | —                     |
| 62  | 402       | c. 50 years  | M   | TB                          | —                | —            | —                        | —                     |
| 63  | 410R      | 35 years     | M   | —                           | Pulmonary TB     | —            | —                        | —                     |
| 64  | 423       | c. 24 years  | M   | TB,<br>pericarditis         | —                | —            | —                        | —                     |
| 65  | 424       | c. 30 years  | M   | TB,<br>silicosis            | —                | —            | —                        | —                     |
| 66  | 426R      | 70 years     | M   | Cardiorenal disease         | Arteriosclerosis | Pulmonary TB | <i>Diabetes mellitus</i> | —                     |
| 67  | 432       | 67 years     | M   | Destructive<br>nasal lesion | TB abscess       | Pulmonary TB | —                        | +                     |
| 68  | 444       | c. 26 years  | M   | TB                          | Pulmonary TB     | —            | —                        | +                     |

| No. | Terry No. | Age at death | Sex | Cause of death                  |               |                   |     | Exhibiting GIs or not |
|-----|-----------|--------------|-----|---------------------------------|---------------|-------------------|-----|-----------------------|
|     |           |              |     | MR                              | DC1           | DC2               | DC3 |                       |
| 69  | 466       | 31 years     | M   | Pulmonary TB                    | —             | —                 | —   | —                     |
| 70  | 468       | 23 years     | M   | Pulmonary TB,<br>TB spondylitis | —             | —                 | —   | —                     |
| 71  | 490       | c. 38 years  | M   | TB                              | —             | Hepatic cirrhosis | —   | —                     |
| 72  | 504       | c. 41 years  | M   | TB,<br>bronchitis               | Pulmonary TB  | —                 | —   | +                     |
| 73  | 522       | 30 years     | M   | Pulmonary TB                    | —             | —                 | —   | +                     |
| 74  | 523       | 47 years     | M   | Pulmonary TB                    | —             | —                 | —   | —                     |
| 75  | 537       | c. 48 years  | M   | Possible malaria                | TB meningitis | —                 | —   | —                     |
| 76  | 541       | 28 years     | F   | Pulmonary TB                    | —             | —                 | —   | +                     |
| 77  | 549       | 33 years     | M   | Myocarditis                     | Pulmonary TB  | —                 | —   | —                     |
| 78  | 555       | 56 years     | M   | Pulmonary TB                    | —             | —                 | —   | —                     |
| 79  | 562       | 17 years     | F   | Pulmonary TB                    | —             | —                 | —   | +                     |
| 80  | 565       | c. 32 years  | M   | Pulmonary TB                    | —             | —                 | —   | —                     |
| 81  | 566       | 40 years     | M   | Empyema                         | Empyema       | Possible TB       | —   | +                     |
| 82  | 568       | 28 years     | F   | Pulmonary TB                    | —             | —                 | —   | +                     |

| No. | Terry No. | Age at death | Sex | Cause of death |              |                  |               | Exhibiting GIs or not |
|-----|-----------|--------------|-----|----------------|--------------|------------------|---------------|-----------------------|
|     |           |              |     | MR             | DC1          | DC2              | DC3           |                       |
| 83  | 571       | 31 years     | M   | TB             | —            | —                | —             | —                     |
| 84  | 572       | 60 years     | M   | Pulmonary TB   | —            | —                | —             | —                     |
| 85  | 575       | c. 47 years  | M   | Pulmonary TB   | —            | —                | —             | +                     |
| 86  | 583       | 24 years     | F   | Pulmonary TB   | —            | —                | —             | —                     |
| 87  | 585       | 64 years     | M   | Pulmonary TB   | —            | —                | —             | —                     |
| 88  | 592       | 25 years     | M   | Pulmonary TB   | —            | —                | —             | —                     |
| 89  | 595       | 25 years     | M   | Pulmonary TB   | —            | —                | —             | +                     |
| 90  | 620       | c. 55 years  | M   | Pulmonary TB   | —            | Myocarditis      | —             | +                     |
| 91  | 621R      | 29 years     | M   | Pulmonary TB   | Pulmonary TB | TB emphysema     | —             | —                     |
| 92  | 626R      | c. 56 years  | F   | Pulmonary TB   | —            | —                | —             | —                     |
| 93  | 664       | c. 48 years  | M   | Pulmonary TB   | Pulmonary TB | Pneumonia        | —             | +                     |
| 94  | 669R      | 72 years     | M   | Heart disease  | Pulmonary TB | Arteriosclerosis | Heart disease | —                     |
| 95  | 679       | 33 years     | F   | TB             | —            | —                | —             | —                     |
| 96  | 680       | 30 years     | F   | Pulmonary TB   | Pulmonary TB | TB peritonitis   | —             | +                     |

| No. | Terry No. | Age at death | Sex | Cause of death         |                |                   |                  | Exhibiting GIs or not |
|-----|-----------|--------------|-----|------------------------|----------------|-------------------|------------------|-----------------------|
|     |           |              |     | MR                     | DC1            | DC2               | DC3              |                       |
| 97  | 728R      | 76 years     | F   | Pulmonary TB, senility | —              | —                 | —                | —                     |
| 98  | 739       | 40 years     | M   | TB, diabetes mellitus  | Pulmonary TB   | Diabetes mellitus | —                | +                     |
| 99  | 752       | 71 years     | M   | TB, pneumonia          | Pneumoconiosis | Myocarditis       | Arteriosclerosis | +                     |
| 100 | 757       | 59 years     | M   | Pulmonary TB           | —              | —                 | —                | —                     |
| 101 | 761       | c. 81 years  | F   | Pulmonary TB           | Pulmonary TB   | Myocarditis       | —                | —                     |
| 102 | 771       | c. 49 years  | M   | Pulmonary TB           | —              | —                 | —                | —                     |
| 103 | 776       | c. 40 years  | M   | Pulmonary TB           | —              | —                 | —                | —                     |
| 104 | 786       | 65 years     | M   | Pulmonary TB           | —              | —                 | —                | —                     |
| 105 | 799       | 38 years     | M   | TB                     | —              | —                 | —                | —                     |
| 106 | 820R      | 52 years     | M   | Pulmonary TB           | —              | —                 | —                | —                     |
| 107 | 822       | 16 years     | F   | Pulmonary TB           | —              | —                 | —                | +                     |
| 108 | 828       | 46 years     | M   | TB                     | —              | —                 | —                | +                     |
| 109 | 844       | 26 years     | F   | Pulmonary TB           | —              | —                 | —                | —                     |
| 110 | 846       | 48 years     | M   | Pulmonary TB           | —              | —                 | —                | —                     |



| No. | Terry No. | Age at death | Sex | Cause of death          |                |              |     | Exhibiting GIs or not |
|-----|-----------|--------------|-----|-------------------------|----------------|--------------|-----|-----------------------|
|     |           |              |     | MR                      | DC1            | DC2          | DC3 |                       |
| 111 | 876       | c. 22 years  | M   | Pulmonary TB            | —              | —            | —   | +                     |
| 112 | 892       | c. 59 years  | M   | Heart disease           | Emphysema      | Pulmonary TB | —   | —                     |
| 113 | 895       | 47 years     | M   | TB                      | —              | —            | —   | —                     |
| 114 | 896RR     | 26 years     | F   | Pulmonary TB            | —              | —            | —   | +                     |
| 115 | 897       | 43 years     | M   | Pulmonary TB            | Pulmonary TB   | Myocarditis  | —   | —                     |
| 116 | 902       | c. 36 years  | M   | Pulmonary TB            | —              | —            | —   | —                     |
| 117 | 907       | 41 years     | F   | Pulmonary TB            | —              | —            | —   | —                     |
| 118 | 914       | 30 years     | M   | TB                      | —              | —            | —   | +                     |
| 119 | 915       | 27 years     | M   | Pulmonary TB            | —              | —            | —   | —                     |
| 120 | 932       | 27 years     | M   | Pulmonary TB            | —              | —            | —   | —                     |
| 121 | 933R      | 40 years     | M   | Probable TB,<br>ascites | TB peritonitis | —            | —   | +                     |
| 122 | 936       | 56 years     | M   | Pulmonary TB            | —              | —            | —   | —                     |
| 123 | 950       | 59 years     | M   | Pulmonary TB            | —              | —            | —   | —                     |
| 124 | 952       | 41 years     | F   | TB                      | —              | —            | —   | +                     |

| No. | Terry No. | Age at death | Sex | Cause of death                |              |     |     | Exhibiting GIs or not |
|-----|-----------|--------------|-----|-------------------------------|--------------|-----|-----|-----------------------|
|     |           |              |     | MR                            | DC1          | DC2 | DC3 |                       |
| 125 | 955       | 26 years     | M   | Pulmonary TB                  | —            | —   | —   | —                     |
| 126 | 957       | 56 years     | F   | Chest contusion               | Pulmonary TB | —   | —   | —                     |
| 127 | 975       | 60 years     | M   | TB,<br>cardiac decompensation | Myocarditis  | —   | —   | +                     |
| 128 | 987       | 23 years     | M   | Pulmonary TB                  | —            | —   | —   | +                     |
| 129 | 1002      | 50 years     | M   | Pulmonary TB                  | —            | —   | —   | —                     |
| 130 | 1005      | 52 years     | M   | Pulmonary TB                  | —            | —   | —   | —                     |
| 131 | 1013      | c. 30 years  | M   | Pulmonary TB                  | —            | —   | —   | —                     |
| 132 | 1018      | 30 years     | M   | Pulmonary TB                  | —            | —   | —   | +                     |
| 133 | 1020      | 24 years     | M   | Pulmonary TB                  | —            | —   | —   | +                     |
| 134 | 1027      | c. 41 years  | F   | Pulmonary TB                  | —            | —   | —   | +                     |
| 135 | 1030      | 62 years     | M   | —                             | Pulmonary TB | —   | —   | —                     |
| 136 | 1031      | 27 years     | M   | Pneumonia                     | Pulmonary TB | —   | —   | —                     |
| 137 | 1033      | 26 years     | M   | Pulmonary TB                  | —            | —   | —   | —                     |
| 138 | 1034      | 48 years     | F   | Pulmonary TB                  | TB nephritis | —   | —   | —                     |

| No. | Terry No. | Age at death | Sex | Cause of death                   |                |                  |     | Exhibiting GIs or not |
|-----|-----------|--------------|-----|----------------------------------|----------------|------------------|-----|-----------------------|
|     |           |              |     | MR                               | DC1            | DC2              | DC3 |                       |
| 139 | 1036      | 38 years     | M   | Asthma,<br>heart disease         | Pulmonary TB   | —                | —   | —                     |
| 140 | 1043      | 46 years     | M   | Pulmonary TB                     | —              | —                | —   | —                     |
| 141 | 1047      | c. 61 years  | M   | TB                               | —              | —                | —   | —                     |
| 142 | 1048      | 39 years     | M   | TB                               | —              | —                | —   | —                     |
| 143 | 1057      | 35 years     | M   | Pulmonary TB                     | —              | —                | —   | +                     |
| 144 | 1072      | 56 years     | M   | Pulmonary TB                     | —              | —                | —   | —                     |
| 145 | 1076      | 25 years     | F   | Pulmonary TB                     | Pulmonary TB   | Pulmonary oedema | —   | +                     |
| 146 | 1086      | 45 years     | M   | Pulmonary TB                     | —              | —                | —   | —                     |
| 147 | 1093      | 29 years     | M   | Pulmonary TB                     | —              | —                | —   | —                     |
| 148 | 1095      | 61 years     | M   | Pulmonary TB                     | —              | —                | —   | —                     |
| 149 | 1096R     | 40 years     | M   | Pulmonary TB                     | —              | —                | —   | +                     |
| 150 | 1105      | 22 years     | F   | Pulmonary TB                     | —              | —                | —   | —                     |
| 151 | 1106      | 28 years     | M   | TB spondylitis,<br>heart disease | TB spondylitis | —                | —   | +                     |
| 152 | 1113      | 29 years     | M   | Pulmonary TB                     | Myocarditis    | —                | —   | —                     |

| No. | Terry No. | Age at death | Sex | Cause of death    |                                  |              |     | Exhibiting GIs or not |
|-----|-----------|--------------|-----|-------------------|----------------------------------|--------------|-----|-----------------------|
|     |           |              |     | MR                | DC1                              | DC2          | DC3 |                       |
| 153 | 1122      | 29 years     | F   | Pulmonary TB      | —                                | —            | —   | —                     |
| 154 | 1124R     | 49 years     | F   | Pulmonary TB      | —                                | —            | —   | —                     |
| 155 | 1129      | 50 years     | F   | Pulmonary TB      | —                                | —            | —   | —                     |
| 156 | 1132      | 67 years     | M   | Pulmonary TB      | —                                | —            | —   | —                     |
| 157 | 1147R     | 32 years     | M   | Pleural expansion | Possible TB,<br>pleural effusion | —            | —   | —                     |
| 158 | 1156      | c. 56 years  | M   | Pulmonary TB      | —                                | —            | —   | —                     |
| 159 | 1157      | 40 years     | M   | Pulmonary TB      | —                                | —            | —   | —                     |
| 160 | 1159      | 26 years     | M   | Pulmonary TB      | —                                | —            | —   | +                     |
| 161 | 1165      | c. 26 years  | M   | Pulmonary TB      | —                                | —            | —   | —                     |
| 162 | 1169      | 28 years     | M   | Pulmonary TB      | —                                | —            | —   | —                     |
| 163 | 1173      | 38 years     | F   | Pulmonary TB      | —                                | —            | —   | —                     |
| 164 | 1183      | c. 21 years  | M   | Pneumonia         | Pulmonary TB                     | Pleurisy     | —   | —                     |
| 165 | 1185      | 33 years     | M   | Pulmonary TB      | Pulmonary<br>haemorrhage         | Pulmonary TB | —   | —                     |
| 166 | 1187      | 21 years     | M   | Pulmonary TB      | —                                | —            | —   | —                     |

| No. | Terry No. | Age at death | Sex | Cause of death                       |                |                         |                                       | Exhibiting GIs or not |
|-----|-----------|--------------|-----|--------------------------------------|----------------|-------------------------|---------------------------------------|-----------------------|
|     |           |              |     | MR                                   | DC1            | DC2                     | DC3                                   |                       |
| 167 | 1190      | c. 64 years  | M   | Pulmonary TB                         | —              | —                       | —                                     | —                     |
| 168 | 1205      | 38 years     | M   | Pulmonary TB                         | —              | —                       | —                                     | —                     |
| 169 | 1210      | 46 years     | F   | TB                                   | Pulmonary TB   | —                       | —                                     | —                     |
| 170 | 1215      | 25 years     | F   | Pulmonary TB                         | Pulmonary TB   | Child birth             | —                                     | —                     |
| 171 | 1222      | 28 years     | F   | Pulmonary TB                         | —              | —                       | —                                     | +                     |
| 172 | 1226      | c. 48 years  | M   | Pulmonary TB                         | —              | —                       | —                                     | —                     |
| 173 | 1230      | 53 years     | M   | Cysto-urethro-rectocele with ascites | Pulmonary TB   | Pneumothorax            | Cirrhosis, myocarditis                | —                     |
| 174 | 1236      | 36 years     | F   | TB                                   | —              | —                       | —                                     | —                     |
| 175 | 1247      | 53 years     | M   | TB                                   | —              | —                       | —                                     | —                     |
| 176 | 1249R     | 40 years     | F   | —                                    | Pulmonary TB   | —                       | —                                     | +                     |
| 177 | 1255      | 39 years     | M   | TB sinusitis                         | TB of the hips | <i>Delirium tremens</i> | —                                     | —                     |
| 178 | 1263R     | 53 years     | M   | Pulmonary TB                         | —              | —                       | —                                     | +                     |
| 179 | 1264      | 45 years     | M   | Pulmonary TB                         | —              | —                       | —                                     | +                     |
| 180 | 1266R     | c. 77 years  | M   | Senility, lues                       | Pulmonary TB   | Syphilis                | Parkinson's disease, arteriosclerosis | —                     |

| No. | Terry No. | Age at death | Sex | Cause of death            |                |                      |                                    | Exhibiting GIs or not |
|-----|-----------|--------------|-----|---------------------------|----------------|----------------------|------------------------------------|-----------------------|
|     |           |              |     | MR                        | DC1            | DC2                  | DC3                                |                       |
| 181 | 1275      | c. 59 years  | M   | Pulmonary TB, myocarditis | Pneumonia      | Arteriosclerosis     | —                                  | —                     |
| 182 | 1278      | 45 years     | M   | Pulmonary TB              | —              | —                    | —                                  | —                     |
| 183 | 1282      | 61 years     | M   | Myocarditis               | Pulmonary TB   | Myocarditis          | —                                  | —                     |
| 184 | 1285      | 36 years     | M   | TB                        | —              | —                    | —                                  | —                     |
| 185 | 1287      | 24 years     | F   | Pulmonary TB              | —              | —                    | —                                  | —                     |
| 186 | 1300      | 28 years     | M   | TB                        | —              | —                    | —                                  | —                     |
| 187 | 1304R     | 58 years     | M   | Pulmonary TB              | Pulmonary TB   | Pericardial effusion | —                                  | +                     |
| 188 | 1309      | 36 years     | M   | Neurological condition    | TB spondylitis | Nephritis            | Paralysis of the lower extremities | +                     |
| 189 | 1313      | 63 years     | M   | TB                        | Syphilis       | Pulmonary TB         | Myocarditis, arteriosclerosis      | —                     |
| 190 | 1315      | 43 years     | M   | TB                        | —              | —                    | —                                  | —                     |
| 191 | 1318      | 43 years     | M   | Pulmonary TB              | —              | —                    | —                                  | +                     |
| 192 | 1319      | c. 36 years  | M   | Pulmonary TB              | Pulmonary TB   | Syphilis             | —                                  | +                     |
| 193 | 1322      | 34 years     | M   | Pulmonary TB              | —              | —                    | —                                  | —                     |
| 194 | 1331      | 41 years     | M   | Pulmonary TB              | —              | —                    | —                                  | +                     |

| No. | Terry No. | Age at death | Sex | Cause of death         |                                      |                |                        | Exhibiting GIs or not |
|-----|-----------|--------------|-----|------------------------|--------------------------------------|----------------|------------------------|-----------------------|
|     |           |              |     | MR                     | DC1                                  | DC2            | DC3                    |                       |
| 195 | 1337RR    | 35 years     | F   | Psychosis              | Pulmonary TB                         | Brain syndrome | —                      | —                     |
| 196 | 1346      | 73 years     | M   | Lung abscess           | Pulmonary TB                         | —              | —                      | —                     |
| 197 | 1352      | 28 years     | M   | Pulmonary TB           | —                                    | —              | —                      | —                     |
| 198 | 1359      | 52 years     | M   | Bronchitis, alcoholism | Pulmonary TB                         | —              | —                      | —                     |
| 199 | 1362      | 36 years     | M   | Pulmonary TB           | —                                    | —              | —                      | —                     |
| 200 | 1367      | 32 years     | M   | Pulmonary TB           | —                                    | —              | —                      | —                     |
| 201 | 1369      | 52 years     | M   | Pulmonary TB           | —                                    | —              | —                      | —                     |
| 202 | 1377      | c. 52 years  | F   | Haemorrhage            | Haemorrhage into the right ventricle | TB meningitis  | —                      | —                     |
| 203 | 1379      | c. 54 years  | M   | Myocarditis            | Myocarditis                          | Pulmonary TB   | —                      | —                     |
| 204 | 1388      | 29 years     | M   | Pulmonary TB           | Pulmonary TB                         | TB peritonitis | Cardiac decompensation | +                     |
| 205 | 1397      | 35 years     | M   | TB                     | —                                    | —              | —                      | —                     |
| 206 | 1398      | 31 years     | M   | TB, meningitis         | —                                    | —              | —                      | —                     |
| 207 | 1401      | 47 years     | F   | Pulmonary TB           | —                                    | —              | —                      | —                     |
| 208 | 1406      | 63 years     | F   | TB                     | —                                    | —              | —                      | —                     |

| No. | Terry No. | Age at death | Sex | Cause of death                 |     |           |     | Exhibiting GIs or not |
|-----|-----------|--------------|-----|--------------------------------|-----|-----------|-----|-----------------------|
|     |           |              |     | MR                             | DC1 | DC2       | DC3 |                       |
| 209 | 1407      | 44 years     | M   | TB                             | —   | —         | —   | —                     |
| 210 | 1419      | 54 years     | F   | Pulmonary TB                   | —   | —         | —   | —                     |
| 211 | 1422R     | c. 35 years  | M   | Pulmonary TB                   | —   | —         | —   | —                     |
| 212 | 1428R     | 71 years     | M   | Pulmonary TB                   | —   | —         | —   | —                     |
| 213 | 1434R     | 19 years     | F   | Pulmonary TB                   | —   | —         | —   | —                     |
| 214 | 1451      | 36 years     | M   | TB                             | —   | —         | —   | —                     |
| 215 | 1453R     | 58 years     | M   | Pulmonary TB                   | —   | —         | —   | —                     |
| 216 | 1455      | 68 years     | M   | TB                             | TB  | Pneumonia | —   | —                     |
| 217 | 1458      | 37 years     | M   | Pulmonary TB                   | —   | —         | —   | +                     |
| 218 | 1476      | 51 years     | F   | Pulmonary TB,<br>TB adenitis   | —   | —         | —   | —                     |
| 219 | 1503      | 22 years     | M   | Pulmonary TB                   | —   | —         | —   | +                     |
| 220 | 1507      | 23 years     | F   | Pulmonary TB,<br>heart disease | —   | —         | —   | —                     |
| 221 | 1521      | 54 years     | M   | Pulmonary TB                   | —   | —         | —   | —                     |
| 222 | 1531      | 40 years     | M   | Pulmonary TB                   | —   | —         | —   | —                     |



| No. | Terry No. | Age at death | Sex | Cause of death             |              |                        |     | Exhibiting GIs or not |
|-----|-----------|--------------|-----|----------------------------|--------------|------------------------|-----|-----------------------|
|     |           |              |     | MR                         | DC1          | DC2                    | DC3 |                       |
| 223 | 1533      | 45 years     | M   | Pulmonary TB               | —            | —                      | —   | +                     |
| 224 | 1536      | 71 years     | F   | Pulmonary TB               | —            | —                      | —   | —                     |
| 225 | 1539      | 23 years     | M   | Pulmonary TB               | —            | —                      | —   | —                     |
| 226 | 1544      | c. 24 years  | F   | TB                         | Pulmonary TB | —                      | —   | —                     |
| 227 | 1551      | 25 years     | F   | ?                          | Salpingitis  | TB peritonitis         | —   | —                     |
| 228 | 1553      | 30 years     | F   | Possible TB, heart disease | Nephritis    | —                      | —   | —                     |
| 229 | 1555      | 41 years     | F   | Pulmonary TB               | —            | —                      | —   | —                     |
| 230 | 1562      | 46 years     | F   | Pulmonary TB               | —            | —                      | —   | —                     |
| 231 | 1568      | c. 62 years  | F   | TB                         | Pulmonary TB | —                      | —   | —                     |
| 232 | 1572      | c. 44 years  | F   | Pulmonary TB               | —            | —                      | —   | +                     |
| 233 | 1576      | 69 years     | F   | Pulmonary TB               | Pulmonary TB | Schizophrenic reaction | —   | —                     |
| 234 | 1629      | 80 years     | F   | Pneumonia                  | Pulmonary TB | —                      | —   | —                     |
