# Supplementary material for: Tracking down the White Plague: The skeletal evidence of tuberculous meningitis in the Robert J. Terry Anatomical Skeletal Collection
Source: PubMed Central journal article supplement (PMC7080279; doi:10.1371/journal.pone.0230418), 2020-03-18
Supplement: pone.0230418.s002.pdf [file pone.0230418.s002.pdf]

**S2 Table: Basic biographic data of individuals in the NTB group (N=193).**

(MR = morgue record; DC1 = death certificate primary; DC2 = death certificate secondary; DC3 = death certificate tertiary; c. = circa; F = female; M = male; + = exhibiting GIs; - = not exhibiting GIs)

| No. | Terry No. | Age at death | Sex | Cause of death             |                                  |                                    |            | Exhibiting GIs or not |
|-----|-----------|--------------|-----|----------------------------|----------------------------------|------------------------------------|------------|-----------------------|
|     |           |              |     | MR                         | DC1                              | DC2                                | DC3        |                       |
| 1   | 4R        | 40 years     | M   | Antral carcinoma           | —                                | Metastasis of the left orbit       | —          | +                     |
| 2   | 12R       | 46 years     | F   | Rectal cancer              | —                                | —                                  | —          | —                     |
| 3   | 19R       | c. 69 years  | F   | Hypertensive heart disease | Hypertensive heart disease       | —                                  | —          | —                     |
| 4   | 25        | c. 65 years  | F   | —                          | —                                | —                                  | —          | —                     |
| 5   | 25R       | c. 43 years  | F   | Alcoholism                 | Pulmonary oedema                 | Cerebral oedema                    | Alcoholism | —                     |
| 6   | 31R       | c. 38 years  | M   | Stab wound                 | Cardiac thrombosis               | Septic stab wound in the right arm | —          | —                     |
| 7   | 44R       | c. 72 years  | F   | Cerebral vascular disease  | Cerebral vascular accident       | Hypertensive heart disease         | —          | —                     |
| 8   | 46R       | c. 67 years  | F   | Accident                   | Pneumonia                        | Subdural haemorrhage from fall     | —          | —                     |
| 9   | 47R       | 78 years     | F   | Pneumonia                  | —                                | —                                  | —          | —                     |
| 10  | 58R       | c. 70 years  | F   | Cardiorenal disease        | Hypertensive heart disease       | —                                  | —          | —                     |
| 11  | 62RR      | c. 38 years  | M   | —                          | —                                | —                                  | —          | —                     |
| 12  | 64R       | 57 years     | F   | Cervical cancer            | Cancerous cervix with metastasis | —                                  | —          | —                     |

| No. | Terry No. | Age at death | Sex | Cause of death           |                                |                                |                                      | Exhibiting GIs or not |
|-----|-----------|--------------|-----|--------------------------|--------------------------------|--------------------------------|--------------------------------------|-----------------------|
|     |           |              |     | MR                       | DC1                            | DC2                            | DC3                                  |                       |
| 13  | 69        | 75 years     | F   | Breast cancer, pneumonia | —                              | Pneumonia                      | —                                    | —                     |
| 14  | 76R       | c. 62 years  | F   | Brain oedema             | Myocarditis                    | Pleural effusion               | —                                    | —                     |
| 15  | 79R       | c. 52 years  | F   | Nephritis                | Nephritis                      | —                              | —                                    | —                     |
| 16  | 104RR     | c. 80 years  | F   | —                        | Cerebral vascular accident     | Arteriosclerotic heart disease | —                                    | —                     |
| 17  | 105R      | 81 years     | F   | Heart failure            | —                              | Arteriosclerosis               | —                                    | —                     |
| 18  | 112R      | c. 59 years  | F   | Rectal cancer            | —                              | —                              | —                                    | —                     |
| 19  | 124R      | 61 years     | F   | Congestive heart failure | Hypertensive heart disease     | Nephritis                      | —                                    | —                     |
| 20  | 127R      | c. 72 years  | F   | Scleroderma              | —                              | —                              | —                                    | —                     |
| 21  | 132R      | 39 years     | F   | Heart disease            | —                              | Nephritis                      | —                                    | —                     |
| 22  | 134       | 53 years     | F   | Pneumonia                | Pneumonia                      | —                              | —                                    | —                     |
| 23  | 135R      | c. 43 years  | F   | Heart failure            | Coronary thrombosis            | —                              | psychosis,<br><i>Dementia precox</i> | —                     |
| 24  | 140RR     | c. 56 years  | F   | Pneumonia                | —                              | —                              | —                                    | —                     |
| 25  | 141R      | c. 83 years  | F   | Cerebral accident        | Arteriosclerotic heart disease | —                              | —                                    | —                     |
| 26  | 142R      | c. 82 years  | F   | Pneumonia                | —                              | Fractured hip                  | Senility                             | —                     |

| No. | Terry No. | Age at death | Sex | Cause of death                   |                       |                          |                                       | Exhibiting GIs or not |
|-----|-----------|--------------|-----|----------------------------------|-----------------------|--------------------------|---------------------------------------|-----------------------|
|     |           |              |     | MR                               | DC1                   | DC2                      | DC3                                   |                       |
| 27  | 149R      | 70 years     | F   | Nephritis                        | Uraemia               | Arteriosclerosis         | Hypertensive heart disease, psychosis | —                     |
| 28  | 167       | 77 years     | M   | Cardiorenal disease              | Myocarditis           | Lues                     | —                                     | —                     |
| 29  | 177R      | c. 33 years  | F   | Haemorrhage                      | Left lung haemorrhage | —                        | —                                     | —                     |
| 30  | 178R      | c. 60 years  | F   | Hypertensive encephalopathy      | Cerebral thrombosis   | Hypertension             | —                                     | —                     |
| 31  | 179R      | c. 76 years  | F   | Myocarditis                      | —                     | —                        | —                                     | —                     |
| 32  | 197R      | 60 years     | F   | Breast carcinoma                 | —                     | —                        | —                                     | +                     |
| 33  | 199       | c. 70 years  | F   | Heart failure                    | Myocarditis           | Senility                 | —                                     | —                     |
| 34  | 209       | 38 years     | M   | Pneumonia                        | —                     | —                        | —                                     | —                     |
| 35  | 218       | 56 years     | F   | <i>Diabetes mellitus, asthma</i> | —                     | —                        | —                                     | —                     |
| 36  | 221       | c. 47 years  | M   | Intestinal obstruction           | —                     | —                        | —                                     | —                     |
| 37  | 227       | 57 years     | M   | Syphilis                         | —                     | —                        | —                                     | —                     |
| 38  | 231       | c. 60 years  | M   | Syphilis, senility               | Breast carcinoma      | Syphilis, senility       | —                                     | —                     |
| 39  | 237       | 70 years     | M   | Hypopyon ulcer of the eye        | —                     | Pneumonia                | —                                     | —                     |
| 40  | 243R      | c. 74 years  | F   | <i>Diabetes mellitus</i>         | Myocardial infarction | <i>Diabetes mellitus</i> | —                                     | —                     |

| No. | Terry No. | Age at death | Sex | Cause of death                    |                    |                   |     | Exhibiting GIs or not |
|-----|-----------|--------------|-----|-----------------------------------|--------------------|-------------------|-----|-----------------------|
|     |           |              |     | MR                                | DC1                | DC2               | DC3 |                       |
| 41  | 247R      | 90 years     | F   | Myocardial failure                | —                  | —                 | —   | —                     |
| 42  | 249R      | 81 years     | F   | —                                 | Cardiac dilatation | Myocarditis       | —   | —                     |
| 43  | 259       | 52 years     | M   | Pneumonia                         | —                  | —                 | —   | —                     |
| 44  | 268       | 62 years     | M   | Senility                          | Myocarditis        | —                 | —   | —                     |
| 45  | 272       | 49 years     | F   | Cardiac decompensation, nephritis | —                  | —                 | —   | +                     |
| 46  | 285       | 54 years     | M   | Pneumonia                         | —                  | —                 | —   | —                     |
| 47  | 293R      | c. 54 years  | F   | Coronary occlusion                | Coronary sclerosis | —                 | —   | —                     |
| 48  | 296R      | 69 years     | M   | Myocarditis                       | —                  | —                 | —   | —                     |
| 49  | 298       | c. 53 years  | M   | —                                 | —                  | —                 | —   | —                     |
| 50  | 306R      | c. 50 years  | F   | Hepatic cirrhosis                 | Brain oedema       | Hepatic cirrhosis | —   | —                     |
| 51  | 314       | 65 years     | M   | Senility, pneumonia               | —                  | Myocarditis       | —   | —                     |
| 52  | 317       | 84 years     | M   | Arteriosclerosis                  | —                  | —                 | —   | —                     |
| 53  | 338       | 65 years     | M   | Pneumonia, myocarditis, senility  | —                  | —                 | —   | —                     |
| 54  | 339R      | 67 years     | F   | Myocarditis                       | —                  | —                 | —   | —                     |

| No. | Terry No. | Age at death | Sex | Cause of death                      |                              |                          |           | Exhibiting GIs or not |
|-----|-----------|--------------|-----|-------------------------------------|------------------------------|--------------------------|-----------|-----------------------|
|     |           |              |     | MR                                  | DC1                          | DC2                      | DC3       |                       |
| 55  | 344R      | 52 years     | F   | Pneumonia                           | Nephritis                    | —                        | —         | —                     |
| 56  | 347       | c. 73 years  | M   | Syphilis                            | —                            | Syphilis                 | —         | —                     |
| 57  | 348R      | c. 28 years  | F   | Eclampsia                           | Nephritis                    | Pregnancy with eclampsia | —         | —                     |
| 58  | 393RR     | c. 58 years  | F   | Accident                            | Pneumonia                    | Femur fracture           | —         | —                     |
| 59  | 397       | 60 years     | M   | Uraemia                             | Syphilis                     | Myocarditis              | Nephritis | —                     |
| 60  | 403       | 52 years     | M   | Cardiorenal disease                 | Myocarditis                  | Nephritis                | —         | —                     |
| 61  | 422       | c. 20 years  | M   | Pneumonia                           | —                            | —                        | —         | —                     |
| 62  | 437R      | c. 44 years  | F   | Pneumonia                           | —                            | —                        | —         | —                     |
| 63  | 438       | c. 86 years  | M   | —                                   | —                            | —                        | —         | —                     |
| 64  | 445       | 66 years     | M   | Ruptured gastric ulcer, peritonitis | —                            | —                        | —         | —                     |
| 65  | 447       | 49 years     | M   | —                                   | Nephritis                    | —                        | —         | —                     |
| 66  | 452       | c. 61 years  | M   | Syphilis, senility                  | Syphilis                     | Nephritis                | —         | —                     |
| 67  | 453       | c. 42 years  | M   | Gangrenous bowel                    | Strangulated inguinal hernia | —                        | —         | —                     |
| 68  | 458       | 41 years     | M   | Haemorrhoids                        | Nephritis                    | —                        | —         | —                     |

| No. | Terry No. | Age at death | Sex | Cause of death                     |                           |                                         |             | Exhibiting GIs or not |
|-----|-----------|--------------|-----|------------------------------------|---------------------------|-----------------------------------------|-------------|-----------------------|
|     |           |              |     | MR                                 | DC1                       | DC2                                     | DC3         |                       |
| 69  | 463       | c. 50 years  | M   | Myocarditis, rheumatism            | —                         | —                                       | —           | —                     |
| 70  | 465       | 25 years     | M   | Post-operative wound of the chest  | Aortic aneurysm           | —                                       | —           | +                     |
| 71  | 470       | c. 44 years  | M   | Cardiorenal disease                | —                         | —                                       | —           | —                     |
| 72  | 477       | 22 years     | M   | Paralysis of the lower extremities | Toxaemia from bed sores   | Septicaemia from ulcers of the buttocks | —           | —                     |
| 73  | 483       | 44 years     | M   | Pneumonia                          | —                         | —                                       | —           | —                     |
| 74  | 496       | 54 years     | M   | Pellagra                           | —                         | —                                       | —           | —                     |
| 75  | 497       | c. 72 years  | M   | Nephritis                          | —                         | —                                       | —           | —                     |
| 76  | 506       | 48 years     | M   | Myocarditis                        | Asthma                    | Myocarditis                             | —           | +                     |
| 77  | 512       | c. 50 years  | F   | Mental condition                   | Myocarditis               | Pneumonia                               | —           | —                     |
| 78  | 513RR     | c. 38 years  | F   | —                                  | Haemorrhagic pachyonychia | —                                       | —           | —                     |
| 79  | 527       | c. 54 years  | M   | Intestinal carcinoma               | Diarrhoea                 | Enteritis                               | Myocarditis | —                     |
| 80  | 528       | c. 64 years  | F   | Cerebral haemorrhage               | Myocarditis               | —                                       | —           | —                     |
| 81  | 534       | c. 50 years  | M   | Stenosis                           | —                         | —                                       | —           | —                     |
| 82  | 536       | 60 years     | M   | Cerebral haemorrhage               | —                         | Arteriosclerosis                        | —           | —                     |

| No. | Terry No. | Age at death | Sex | Cause of death                  |                        |                             |                       | Exhibiting GIs or not |
|-----|-----------|--------------|-----|---------------------------------|------------------------|-----------------------------|-----------------------|-----------------------|
|     |           |              |     | MR                              | DC1                    | DC2                         | DC3                   |                       |
| 83  | 545       | 77 years     | M   | Heart disease                   | Myocarditis            | Arteriosclerosis            | —                     | —                     |
| 84  | 552       | 72 years     | M   | Myocarditis                     | Nephritis              | Myocarditis                 | —                     | —                     |
| 85  | 573       | 59 years     | M   | Syphilis                        | —                      | —                           | —                     | —                     |
| 86  | 582       | c. 49 years  | M   | Pneumonia                       | —                      | —                           | —                     | —                     |
| 87  | 586       | 40 years     | F   | Cardiorenal disease             | Nephritis              | —                           | —                     | —                     |
| 88  | 597       | c. 61 years  | M   | Myocarditis                     | Valvular heart disease | —                           | —                     | —                     |
| 89  | 602       | 49 years     | M   | Pleurisy                        | Influenza              | Pulmonary infarct & abscess | Pulmonary haemorrhage | —                     |
| 90  | 608       | 45 years     | M   | Pneumonia, mitral regurgitation | Myocarditis            | Nephritis                   | —                     | —                     |
| 91  | 617R      | 43 years     | F   | Pneumonia                       | —                      | Encephalic malacia          | —                     | —                     |
| 92  | 627R      | c. 27 years  | F   | Poisoning                       | Arsenical poisoning    | Neosalvarsan                | —                     | —                     |
| 93  | 629       | c. 72 years  | M   | Pneumonia, senility             | —                      | Hemiplegia                  | —                     | —                     |
| 94  | 636       | 51 years     | M   | Cardiac condition               | Myocarditis            | Bronchitis                  | —                     | —                     |
| 95  | 657R      | c. 28 years  | F   | Mitral stenosis                 | —                      | —                           | —                     | —                     |
| 96  | 686       | c. 78 years  | F   | Myocarditis, senile dementia    | —                      | —                           | —                     | —                     |

| No. | Terry No. | Age at death | Sex | Cause of death                   |                                      |                  |     | Exhibiting GIs or not |
|-----|-----------|--------------|-----|----------------------------------|--------------------------------------|------------------|-----|-----------------------|
|     |           |              |     | MR                               | DC1                                  | DC2              | DC3 |                       |
| 97  | 694       | c. 52 years  | M   | Myocarditis, arteriosclerosis    | Myocarditis                          | Arteriosclerosis | —   | —                     |
| 98  | 702R      | 47 years     | M   | Myocardial insufficiency         | Hypertensive heart disease           | Nephritis        | —   | —                     |
| 99  | 726       | c. 62 years  | M   | Myocarditis, syphilis            | —                                    | —                | —   | —                     |
| 100 | 727       | c. 45 years  | M   | Gastric carcinoma                | —                                    | —                | —   | —                     |
| 101 | 759       | 60 years     | M   | Cardiorenal disease              | Myocarditis                          | —                | —   | —                     |
| 102 | 789       | 40 years     | M   | Syphilis                         | —                                    | —                | —   | —                     |
| 103 | 795       | c. 57 years  | M   | Carcinoma of the cervical glands | —                                    | —                | —   | —                     |
| 104 | 809R      | 60 years     | M   | Hypertensive heart disease       | —                                    | —                | —   | —                     |
| 105 | 823       | c. 60 years  | M   | Cerebral apoplexy                | —                                    | —                | —   | —                     |
| 106 | 833R      | 47 years     | M   | Blastomycosis                    | —                                    | —                | —   | —                     |
| 107 | 834R      | 87 years     | F   | Degenerative heart disease       | Arteriosclerosis                     | —                | —   | —                     |
| 108 | 863       | 73 years     | M   | Senility                         | Cardiorenal disease                  | Pneumonia        | —   | —                     |
| 109 | 891       | 39 years     | F   | Pneumonia                        | —                                    | —                | —   | —                     |
| 110 | 903R      | c. 51 years  | F   | —                                | Subdural brain haemorrhage from fall | —                | —   | —                     |



| No. | Terry No. | Age at death | Sex | Cause of death              |                      |             |           | Exhibiting GIs or not |
|-----|-----------|--------------|-----|-----------------------------|----------------------|-------------|-----------|-----------------------|
|     |           |              |     | MR                          | DC1                  | DC2         | DC3       |                       |
| 111 | 919       | c. 55 years  | M   | Myocarditis                 | —                    | —           | —         | —                     |
| 112 | 930R      | c. 80 years  | F   | Cerebral apoplexy           | —                    | —           | —         | —                     |
| 113 | 934       | 62 years     | F   | Myocarditis, heart failure  | —                    | —           | —         | —                     |
| 114 | 938       | 73 years     | M   | Myocarditis, sigmoid cancer | Pneumonia            | Myocarditis | —         | —                     |
| 115 | 941       | 59 years     | M   | Cardiac condition           | Myocarditis          | —           | —         | —                     |
| 116 | 946       | 48 years     | M   | Pneumonia                   | —                    | —           | —         | —                     |
| 117 | 948       | 39 years     | F   | Heart disease               | Myocarditis          | —           | —         | —                     |
| 118 | 957R      | 76 years     | F   | Femur fracture              | —                    | —           | —         | —                     |
| 119 | 964       | 49 years     | M   | Cerebral apoplexy           | Cerebral haemorrhage | —           | —         | —                     |
| 120 | 968       | 48 years     | M   | Neurological condition      | Lues                 | —           | —         | —                     |
| 121 | 973       | 66 years     | M   | Pneumonia                   | Myocarditis          | Pneumonia   | —         | —                     |
| 122 | 1023      | c. 20 years  | M   | Car accident                | —                    | —           | —         | —                     |
| 123 | 1029R     | 30 years     | M   | Parkinson's disease         | —                    | —           | —         | —                     |
| 124 | 1045      | c. 41 years  | M   | Nephritis                   | Pulmonary embolism   | Myocarditis | Nephritis | —                     |

| No. | Terry No. | Age at death | Sex | Cause of death                              |                                |                                |                | Exhibiting GIs or not |
|-----|-----------|--------------|-----|---------------------------------------------|--------------------------------|--------------------------------|----------------|-----------------------|
|     |           |              |     | MR                                          | DC1                            | DC2                            | DC3            |                       |
| 125 | 1046      | c. 60 years  | M   | —                                           | Hypertensive heart disease     | —                              | —              | —                     |
| 126 | 1050      | 64 years     | M   | Intestinal stasis                           | Intestinal obstruction         | Peritonitis                    | —              | —                     |
| 127 | 1058      | 68 years     | F   | Myocarditis                                 | Cerebral apoplexy              | Cerebral haemorrhage           | Myocarditis    | —                     |
| 128 | 1060      | c. 65 years  | M   | Asthma, myocarditis                         | —                              | —                              | —              | —                     |
| 129 | 1066R     | 62 years     | M   | Pneumonia                                   | Degenerative heart disease     | Arteriosclerosis               | —              | —                     |
| 130 | 1070      | c. 51 years  | M   | Nephritis                                   | Myocarditis                    | Nephritis                      | —              | —                     |
| 131 | 1071R     | c. 70 years  | F   | Accident                                    | Endocarditis                   | Stenosis, hip fracture         | —              | —                     |
| 132 | 1098      | c. 60 years  | M   | Cerebral haemorrhage                        | Cerebral haemorrhage           | Arteriosclerosis               | —              | —                     |
| 133 | 1100RR    | c. 76 years  | F   | Brain syndrome                              | Arteriosclerotic heart disease | Brain syndrome                 | —              | —                     |
| 134 | 1102R     | c. 76 years  | F   | Coronary thrombosis                         | Coronary thrombosis            | Arteriosclerotic heart disease | —              | —                     |
| 135 | 1107      | 78 years     | M   | Myocarditis, senility                       | —                              | —                              | —              | —                     |
| 136 | 1130R     | 79 years     | M   | Convulsions                                 | Cerebral haemorrhage           | Arteriosclerosis               | —              | —                     |
| 137 | 1133RR    | c. 80 years  | F   | Arteriosclerosis, avitaminosis, dehydration | Malnutrition                   | Senility                       | —              | —                     |
| 138 | 1134R     | 70 years     | F   | Hyperarthritis                              | Arteriosclerosis               | Senile psychosis               | Hyperarthritis | —                     |

| No. | Terry No. | Age at death | Sex | Cause of death                           |                                |                  |                  | Exhibiting GIs or not |
|-----|-----------|--------------|-----|------------------------------------------|--------------------------------|------------------|------------------|-----------------------|
|     |           |              |     | MR                                       | DC1                            | DC2              | DC3              |                       |
| 139 | 1137R     | c. 78 years  | F   | Pneumonia                                | Degenerative heart disease     | Pneumonia        | Arteriosclerosis | —                     |
| 140 | 1138R     | 37 years     | M   | Pneumonia                                | Pneumonia                      | Pleural effusion | —                | —                     |
| 141 | 1140      | 46 years     | M   | Cardiac decompensation                   | Myocarditis                    | —                | —                | —                     |
| 142 | 1163      | 41 years     | F   | Pellagra                                 | —                              | —                | —                | —                     |
| 143 | 1182R     | c. 48 years  | F   | Pneumonia                                | Aortitis                       | —                | —                | —                     |
| 144 | 1186      | c. 44 years  | F   | Lung abscess                             | Lung abscess                   | Pneumonia        | —                | —                     |
| 145 | 1192      | 58 years     | M   | Pneumonia                                | —                              | —                | —                | —                     |
| 146 | 1204R     | 74 years     | M   | Heart disease                            | Arteriosclerotic heart disease | —                | —                | —                     |
| 147 | 1219      | 79 years     | M   | Myocarditis, nephritis                   | Myocarditis                    | Senility         | —                | —                     |
| 148 | 1224      | 60 years     | M   | Mediastinal tumour                       | Aortic aneurysm                | —                | —                | —                     |
| 149 | 1228      | 79 years     | M   | Nephritis, pneumonia                     | Myocarditis                    | Pneumonia        | —                | —                     |
| 150 | 1229      | c. 73 years  | M   | Gangrenous foot                          | Gangrenous foot                | Arteriosclerosis | Myocarditis      | —                     |
| 151 | 1232      | 57 years     | M   | Pneumonia, myocarditis, arteriosclerosis | —                              | —                | —                | —                     |
| 152 | 1243R     | c. 49 years  | F   | Myocarditis                              | —                              | —                | —                | —                     |

| No. | Terry No. | Age at death | Sex | Cause of death             |                                |                        |                        | Exhibiting GIs or not |
|-----|-----------|--------------|-----|----------------------------|--------------------------------|------------------------|------------------------|-----------------------|
|     |           |              |     | MR                         | DC1                            | DC2                    | DC3                    |                       |
| 153 | 1252      | 50 years     | F   | Uterine fibroid            | Nephritis                      | Uraemia                | —                      | —                     |
| 154 | 1267      | c. 78 years  | M   | Myocarditis, senility      | —                              | —                      | —                      | —                     |
| 155 | 1271      | 58 years     | M   | Lues                       | Lues                           | Myocarditic            | Cardiac decompensation | —                     |
| 156 | 1277      | c. 59 years  | M   | Heat stroke                | Epilepsy                       | —                      | —                      | —                     |
| 157 | 1291      | c. 52 years  | M   | Cardiac decompensation     | Hypertensive heart disease     | —                      | —                      | —                     |
| 158 | 1299R     | 52 years     | M   | Gastric ulcer              | Gastric ulcer                  | Lues                   | —                      | —                     |
| 159 | 1310      | c. 85 years  | M   | Cardiovascular reactivity  | Arteriosclerotic heart disease | Auricular fibrillation | —                      | —                     |
| 160 | 1342      | c. 74 years  | M   | Hypertensive heart disease | —                              | —                      | —                      | —                     |
| 161 | 1343      | c. 73 years  | F   | Heart failure, nephritis   | Myocarditis                    | Nephritis              | Hypertension           | —                     |
| 162 | 1347R     | 38 years     | F   | Cardiorenal disease        | Hypertensive heart disease     | —                      | —                      | —                     |
| 163 | 1353R     | c. 50 years  | F   | Pneumonia                  | —                              | —                      | —                      | —                     |
| 164 | 1368      | 37 years     | M   | Appendicitis               | Gangrenous appendix            | Pneumonia              | —                      | —                     |
| 165 | 1375R     | c. 38 years  | M   | Pneumonia                  | —                              | —                      | —                      | —                     |
| 166 | 1376      | 46 years     | M   | Pneumonia                  | Pneumonia                      | Myocarditis            | —                      | —                     |

| No. | Terry No. | Age at death | Sex | Cause of death                |                                   |                           |                   | Exhibiting GIs or not |
|-----|-----------|--------------|-----|-------------------------------|-----------------------------------|---------------------------|-------------------|-----------------------|
|     |           |              |     | MR                            | DC1                               | DC2                       | DC3               |                       |
| 167 | 1378      | 54 years     | M   | Peritonitis                   | —                                 | —                         | —                 | +                     |
| 168 | 1387      | 40 years     | M   | Lues                          | —                                 | —                         | —                 | —                     |
| 169 | 1405      | 75 years     | F   | Myocarditis                   | —                                 | —                         | —                 | —                     |
| 170 | 1411R     | 65 years     | M   | —                             | Nephritis, uraemia                | Hypertrophied prostate    | —                 | —                     |
| 171 | 1416      | c. 70 years  | F   | Hypertensive heart disease    | Arteriosclerotic heart disease    | Senile psychosis          | —                 | —                     |
| 172 | 1417R     | 37 years     | F   | Dysentery                     | Perianal & ischiorectal abscesses | Staphylococcosis          | Secondary anaemia | —                     |
| 173 | 1435      | 66 years     | F   | Myocarditis, arteriosclerosis | —                                 | —                         | —                 | —                     |
| 174 | 1439R     | 56 years     | M   | Epilepsy, hypertension        | Pneumonia                         | Arteriosclerotic dementia | —                 | —                     |
| 175 | 1444      | 59 years     | M   | Heart disease                 | Arteriosclerotic heart disease    | —                         | —                 | —                     |
| 176 | 1467      | 73 years     | M   | Gastric malignancy            | Arteriosclerotic heart disease    | Cardiac decompensation    | —                 | —                     |
| 177 | 1495      | 89 years     | M   | Myocarditis                   | Myocarditis                       | Pneumonia                 | —                 | —                     |
| 178 | 1502R     | c. 82 years  | F   | Arteriosclerosis              | Arteriosclerosis                  | Senility                  | —                 | —                     |
| 179 | 1505R     | 41 years     | F   | Hemiplegia                    | Hypertension                      | Cerebral haemorrhage      | —                 | —                     |
| 180 | 1514      | c. 70 years  | M   | Hemiplegia, strictures        | —                                 | —                         | —                 | —                     |

| No. | Terry No. | Age at death | Sex | Cause of death                      |                                     |                                   |                   | Exhibiting GIs or not |
|-----|-----------|--------------|-----|-------------------------------------|-------------------------------------|-----------------------------------|-------------------|-----------------------|
|     |           |              |     | MR                                  | DC1                                 | DC2                               | DC3               |                       |
| 181 | 1519      | 71 years     | M   | Myocarditis                         | Myocarditis, cardiac decompensation | —                                 | —                 | —                     |
| 182 | 1534      | 44 years     | M   | Urinary bladder calculi             | Pyelonephritis, catarrhal cystitis  | Bladder & urethral calculi        | —                 | —                     |
| 183 | 1543      | c. 70 years  | M   | Thrombosis                          | —                                   | —                                 | —                 | —                     |
| 184 | 1549      | c. 40 years  | F   | Cerebral apoplexy                   | —                                   | —                                 | —                 | —                     |
| 185 | 1552      | 84 years     | F   | Hypertension, senility              | Cardiac decompensation              | Arteriosclerotic vascular disease | —                 | —                     |
| 186 | 1554      | c. 56 years  | F   | Hypertensive heart disease          | —                                   | —                                 | —                 | —                     |
| 187 | 1567      | c. 69 years  | F   | Stroke, heart failure               | —                                   | —                                 | —                 | —                     |
| 188 | 1581      | 64 years     | F   | Arteriosclerotic heart disease      | —                                   | —                                 | —                 | —                     |
| 189 | 1592      | 53 years     | F   | Arteriosclerotic heart disease      | —                                   | —                                 | —                 | —                     |
| 190 | 1599      | c. 41 years  | F   | Suicide                             | —                                   | —                                 | —                 | —                     |
| 191 | 1604      | 50 years     | F   | Cerebral haemorrhage                | Cerebral haemorrhage                | Hypertensive vascular disease     | —                 | —                     |
| 192 | 1614      | 38 years     | F   | —                                   | Congestive heart failure            | Rheumatic mitral valve disease    | Mental deficiency | —                     |
| 193 | 1627      | c. 90 years  | F   | Hypertensive heart disease, failure | Arteriosclerotic heart disease      | —                                 | —                 | —                     |
