# Supplementary material for: Tracking down the White Plague: The skeletal evidence of tuberculous meningitis in the Robert J. Terry Anatomical Skeletal Collection
Source: PubMed Central journal article supplement (PMC7080279; doi:10.1371/journal.pone.0230418), 2020-03-18
Supplement: pone.0230418.s004.pdf [file pone.0230418.s004.pdf]

**S4 Table: Individual data of cases exhibiting GIs regarding other probable TBM-associated endocranial bony changes in the NTB group ( $\Sigma=6$ ). (APDIs = abnormally pronounced digital impressions; ABVIs = abnormal blood vessel impressions; PAs = periosteal appositions; + = present; - = not present)**

| No. | Terry No. | APDIs | ABVIs | PAs |
|-----|-----------|-------|-------|-----|
| 1   | 4R        | -     | -     | -   |
| 2   | 197R      | +     | -     | -   |
| 3   | 272       | +     | -     | +   |
| 4   | 465       | +     | -     | -   |
| 5   | 506       | +     | -     | -   |
| 6   | 1378      | -     | -     | -   |
