# Supplementary material for: Tracking down the White Plague: The skeletal evidence of tuberculous meningitis in the Robert J. Terry Anatomical Skeletal Collection
Source: PubMed Central journal article supplement (PMC7080279; doi:10.1371/journal.pone.0230418), 2020-03-18
Supplement: pone.0230418.s005.pdf [file pone.0230418.s005.pdf]

**S5 Table: Individual data of cases exhibiting GIs regarding possible TB-related non-endocranial bony changes in the NTB group ( $\Sigma=6$ ).  
(PNBFs = periosteal new bone formations; HPO = hypertrophic pulmonary osteopathy; + = present; - = not present)**

| No. | Terry No. | PNBFs on the visceral costal surfaces | HPO | Extra-spinal osteomyelitis | Extra-spinal arthritis | Vertebral hypervascularization | Vertebral lytic lesions and/or arthritis | Reactive new bone formations indicative of a cold abscess |
|-----|-----------|---------------------------------------|-----|----------------------------|------------------------|--------------------------------|------------------------------------------|-----------------------------------------------------------|
| 1   | 4R        | -                                     | -   | -                          | -                      | -                              | -                                        | -                                                         |
| 2   | 197R      | -                                     | -   | -                          | -                      | -                              | -                                        | -                                                         |
| 3   | 272       | -                                     | -   | -                          | -                      | -                              | -                                        | -                                                         |
| 4   | 465       | +                                     | -   | +                          | -                      | +                              | -                                        | -                                                         |
| 5   | 506       | +                                     | +   | +                          | -                      | -                              | -                                        | -                                                         |
| 6   | 1378      | -                                     | -   | -                          | -                      | +                              | -                                        | -                                                         |
