# Supplementary material for: Tracking down the White Plague: The skeletal evidence of tuberculous meningitis in the Robert J. Terry Anatomical Skeletal Collection
Source: PubMed Central journal article supplement (PMC7080279; doi:10.1371/journal.pone.0230418), 2020-03-18

**S1 Fig. Demographic profile of individuals surveyed in the Terry Collection.**

Number of individuals in the A) TB group ( $\Sigma=234$ ) and B) NTB group ( $\Sigma=193$ ) by age at death and sex.

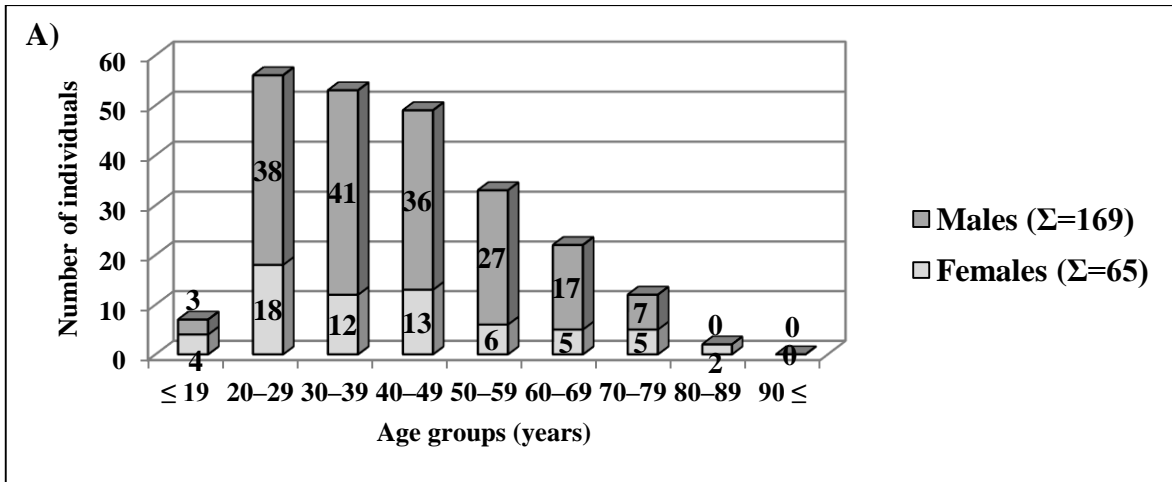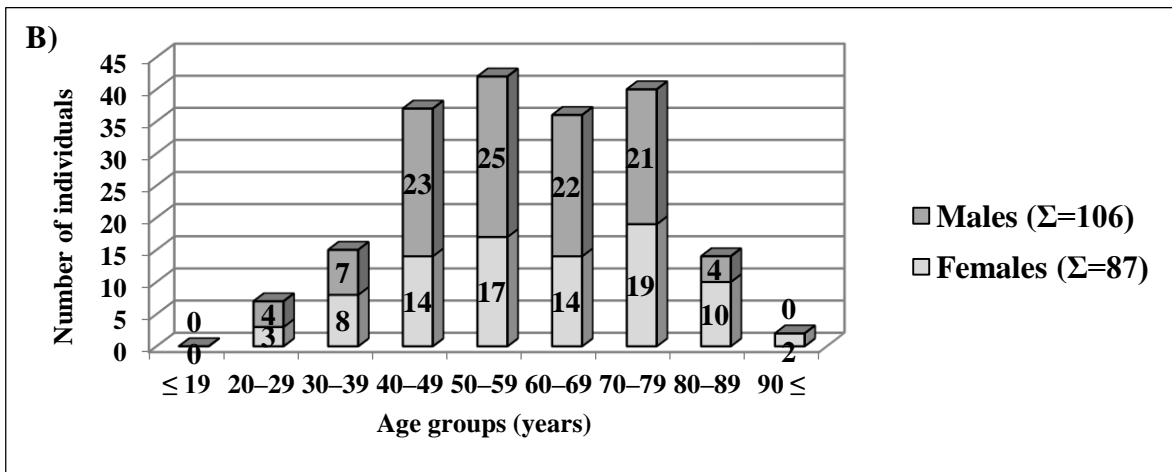

Supplement: pone.0230418.s006.pdf [file pone.0230418.s006.pdf]
